# Supplementary material
Source: MDPI journal article supplement (https://www.mdpi.com/2073-4395/12/8/1844)
Supplement: s1 [file s1]

## Supplementary Material

### 1. Supplementary Tables

**Table S1. *Fritillaria* species with medicinal activity in the world**

| Species                        | Specimen collection places                                 | Species                     | Specimen collection places                               |
|--------------------------------|------------------------------------------------------------|-----------------------------|----------------------------------------------------------|
| <i>F. anhuiensis</i> [75]      | Anhui in China                                             | <i>F. persica</i> [145]     | Turkey and Iran                                          |
| <i>F. camschatcensis</i> [134] | Washington State in America                                | <i>F. pinardii</i> [9]      | Eastern Mediterranean                                    |
| <i>F. cirrhosa</i> [26]        | Southwest China and Pakistan                               | <i>F. przewalskii</i> [146] | Western China                                            |
| <i>F. collina</i> [135]        | Caucasus                                                   | <i>F. pudica</i> [147]      | Western North America                                    |
| <i>F. crassicaulis</i> [136]   | Yunnan in China                                            | <i>F. raddeana</i> [148]    | Pakistan                                                 |
| <i>F. davidii</i> [137]        | Sichuan in China                                           | <i>F. recurva</i> [149]     | California in America                                    |
| <i>F. delavayi</i> [37]        | Southwest China                                            | <i>F. roderickii</i> [150]  | California in America                                    |
| <i>F. ebeiensis</i> [138]      | Hubei in China                                             | <i>F. ruthenica</i> [96]    | European Russia                                          |
| <i>F. ferganensis</i> [139]    | Xinjiang Uygur Autonomous region in China                  | <i>F. taipaiensis</i> [31]  | Shanxi, Gansu, Sichuan and Hubei in China                |
| <i>F. karelinii</i> [52]       | Xinjiang Uygur Autonomous region in China and Central Asia | <i>F. thunbergii</i> [65]   | Zhejiang and Jiangsu in China and Japan                  |
| <i>F. liliacea</i> [140]       | California in America                                      | <i>F. tortifolia</i> [56]   | Xinjiang Uygur Autonomous region in China                |
| <i>F. maximowiczii</i> [53]    | Hebei in China                                             | <i>F. unibracteata</i> [30] | Sichuan and Qinghai in China                             |
| <i>F. meleagroides</i> [141]   | Xinjiang Uygur Autonomous region in China and Russia       | <i>F. ussuriensis</i> [76]  | Northeast China and Russia                               |
| <i>F. meleagris</i> [142]      | Western Asia and Northwestern Europe                       | <i>F. verticillata</i> [54] | Xinjiang Uygur Autonomous region in China and Kazakhstan |
| <i>F. monantha</i> [143]       | Zhejiang and Henan in China                                | <i>F. wabuensis</i> [151]   | West China                                               |
| <i>F. ojaiensis</i> [144]      | California in America                                      | <i>F. walujewii</i> [22]    | Xinjiang Uygur Autonomous region in China and Russia     |
| <i>F. pallidiflora</i> [38]    | Xinjiang Uygur Autonomous region in China and Russia       |                             |                                                          |

**Table S2. Other *Fritillaria* species in the world (*Fritillaria* species with E as superscript were endangered)**

| Species                                                                                                           | Specimen collection places | Species                             | Specimen collection places |
|-------------------------------------------------------------------------------------------------------------------|----------------------------|-------------------------------------|----------------------------|
| <b><i>Fritillaria</i> species in Asian (65; 26 medicinal <i>Fritillaria</i> species in Table S1; 91 in all)</b>   |                            |                                     |                            |
| <i>F. acmopetala</i>                                                                                              | Turkey                     | <i>F. imperialis</i>                | China, Turkey and Iran     |
| <i>F. alburyana</i>                                                                                               | Turkey and Iran            | <i>F. japonica</i>                  | Japan                      |
| <i>F. alfredae</i>                                                                                                | Turkey                     | <i>F. kiusiana</i>                  | Japan                      |
| <i>F. amabilis</i>                                                                                                | Japan                      | <i>F. koidzumiana</i>               | Turkey                     |
| <i>F. amana</i>                                                                                                   | Turkey                     | <i>F. kotschyana</i>                | Northern Iran              |
| <i>F. ariana</i>                                                                                                  | Central Asia               | <i>F. kurdica</i>                   | Turkey                     |
| <i>F. armena</i>                                                                                                  | Turkey                     | <i>F. lagodechiana</i>              | Russia                     |
| <i>F. asumaniae</i>                                                                                               | Turkey                     | <i>F. latifolia</i>                 | Turkey, Iran and Russia    |
| <i>F. atrolineata</i>                                                                                             | Iran                       | <i>F. melananthera</i>              | Turkey                     |
| <i>F. aurea</i>                                                                                                   | Turkey                     | <i>F. meleagris</i>                 | Russia                     |
| <i>F. avromanica</i>                                                                                              | Iran                       | <i>F. michailovskyi</i>             | Turkey                     |
| <i>F. ayakoana</i>                                                                                                | Japan                      | <i>F. minima</i>                    | Turkey                     |
| <i>F. baisunensis</i>                                                                                             | Uzbekistan                 | <i>F. minuta</i>                    | Turkey                     |
| <i>F. bithynica</i>                                                                                               | Turkey                     | <i>F. muraiana</i>                  | Japan                      |
| <i>F. bucharica</i>                                                                                               | Turkey                     | <i>F. olgae</i>                     | Russia                     |
| <i>F. carica</i> <sup>E</sup>                                                                                     | Turkey                     | <i>F. olivieri</i>                  | Iran                       |
| <i>F. caucasica</i>                                                                                               | Turkey and Russia          | <i>F. orientalis</i>                | Russia                     |
| <i>F. chitralensis</i>                                                                                            | Chitral and Pakistan       | <i>F. ozdemir-elmassii</i>          | Turkey                     |
| <i>F. chlorantha</i>                                                                                              | Iran                       | <i>F. regelii</i>                   | Asia                       |
| <i>F. chlororhabdota</i>                                                                                          | Iran                       | <i>F. reuteri</i>                   | Turkey                     |
| <i>F. crassifolia</i>                                                                                             | Turkey                     | <i>F. sewerzowii</i>                | Kyrgyzstan and China       |
| <i>F. dagana</i>                                                                                                  | Mongolia                   | <i>F. serpenticola</i>              | Turkey                     |
| <i>F. dzhabavae</i>                                                                                               | Russia                     | <i>F. shikokiana</i>                | Japan                      |
| <i>F. eduardii</i>                                                                                                | Central Asia               | <i>F. sibthorpiana</i> <sup>E</sup> | Turkey                     |
| <i>F. enginiana</i>                                                                                               | Turkey                     | <i>F. sonnikovae</i>                | Russia                     |
| <i>F. fleischeriana</i>                                                                                           | Turkey                     | <i>F. stenantha</i>                 | West to Central Asia       |
| <i>F. forbesii</i>                                                                                                | Southwestern Turkey        | <i>F. straussii</i>                 | Turkey                     |
| <i>F. frankiorum</i>                                                                                              | Turkey                     | <i>F. sororum</i>                   | Turkey                     |
| <i>F. fusca</i> <sup>E</sup>                                                                                      | China                      | <i>F. tubaeformis</i>               | Alps                       |
| <i>F. gibbosa</i>                                                                                                 | Iran and Pakistan          | <i>F. tunievii</i>                  | Russia                     |
| <i>F. grandiflora</i> <sup>E</sup>                                                                                | Russia                     | <i>F. uva-vulpis</i>                | Turkey, Iraq and Iran      |
| <i>F. hakkarensis</i>                                                                                             | Turkey and Iraq            | <i>F. zagrica</i>                   | Iran and Turkey            |
| <i>F. hermonis</i>                                                                                                | Lebanon                    |                                     |                            |
| <b><i>Fritillaria</i> species in European (40; 1 medicinal <i>Fritillaria</i> species in Table S1; 41 in all)</b> |                            |                                     |                            |
| <i>F. assyriaca</i>                                                                                               | Turkey                     | <i>F. montana</i> <sup>E</sup>      | Europe                     |
| <i>F. baskilensis</i>                                                                                             | Turkey                     | <i>F. mughlae</i>                   | Turkey                     |
| <i>F. burnatii</i>                                                                                                | France and Italy           | <i>F. mutabilis</i> <sup>E</sup>    | Greece                     |
| <i>F. byfieldii</i>                                                                                               | Turkey                     | <i>F. obliqua</i> <sup>E</sup>      | Athens and Greece          |

|                                                                                                                         |                             |                                     |                          |
|-------------------------------------------------------------------------------------------------------------------------|-----------------------------|-------------------------------------|--------------------------|
| <i>F. conica</i> <sup>E</sup>                                                                                           | Greece                      | <i>F. phitosii</i>                  | Greece                   |
| <i>F. davisii</i> <sup>E</sup>                                                                                          | Greece                      | <i>F. pontica</i>                   | Greece and Turkey        |
| <i>F. drenovskii</i> <sup>E</sup>                                                                                       | Greece                      | <i>F. pyrenaica</i>                 | France and Spain         |
| <i>F. ehrhartii</i> <sup>E</sup>                                                                                        | Greece                      | <i>F. rhodia</i> <sup>E</sup>       | Greece                   |
| <i>F. elwesii</i>                                                                                                       | Southwestern Turkey         | <i>F. rhodocanakis</i> <sup>E</sup> | Greek island Hydra       |
| <i>F. euboeica</i> <sup>E</sup>                                                                                         | Greek island of Evvoia      | <i>F. rixii</i>                     | Greece                   |
| <i>F. gencensis</i>                                                                                                     | Turkey                      | <i>F. serpenticola</i>              | Turkey                   |
| <i>F. graeca</i> <sup>E</sup>                                                                                           | Albania and Greece          | <i>F. skorpili</i>                  | Bulgaria                 |
| <i>F. gussichiae</i> <sup>E</sup>                                                                                       | Bulgaria and Greece         | <i>F. species</i>                   | European                 |
| <i>F. involucrata</i>                                                                                                   | France                      | <i>F. stribrnyi</i>                 | Bulgaria and Turkey      |
| <i>F. kittaniae</i>                                                                                                     | Turkey                      | <i>F. thessala</i>                  | Greece                   |
| <i>F. legionensis</i>                                                                                                   | Spain                       | <i>F. tubiformis</i>                | Southern French Alps     |
| <i>F. lusitanica</i>                                                                                                    | Andalucía                   | <i>F. tuntasia</i>                  | Greek Island             |
| <i>F. macedonica</i>                                                                                                    | Albania                     | <i>F. viridiflora</i>               | Turkey                   |
| <i>F. messanensis</i> <sup>E</sup>                                                                                      | Mediterranean               | <i>F. wendelboi</i>                 | Turkey                   |
| <i>F. milasensis</i>                                                                                                    | Turkey                      | <i>F. whittallii</i>                | Southwest Turkey         |
| <b><i>Fritillaria</i> species in North American (15; 6 medicinal <i>Fritillaria</i> species in Table S1; 21 in all)</b> |                             |                                     |                          |
| <i>F. affinis</i>                                                                                                       | North America               | <i>F. glauca</i>                    | Oregon and California    |
| <i>F. agrestis</i>                                                                                                      | California                  | <i>F. micrantha</i>                 | California               |
| <i>F. atropurpurea</i>                                                                                                  | West America                | <i>F. pinetorum</i>                 | California               |
| <i>F. biflora</i>                                                                                                       | California                  | <i>F. pluriflora</i>                | California               |
| <i>F. brandegeei</i>                                                                                                    | California                  | <i>F. purdyi</i>                    | Northern California      |
| <i>F. eastwoodiae</i>                                                                                                   | Northern California         | <i>F. striata</i>                   | California               |
| <i>F. falcata</i> <sup>E</sup>                                                                                          | California                  | <i>F. viridea</i>                   | California               |
| <i>F. gentneri</i>                                                                                                      | California                  |                                     |                          |
| <b>Miscellaneous <i>Fritillaria</i> species (5)</b>                                                                     |                             |                                     |                          |
| <i>F. latakiensis</i>                                                                                                   | Syria and Turkish mountains | <i>F. oranensis</i> <sup>E</sup>    | Mediterranean            |
| <i>F. kaiensis</i> <sup>E</sup>                                                                                         | Unknown                     | <i>F. epirotica</i> <sup>E</sup>    | Europe and Mediterranean |
| <i>F. macrocarpa</i>                                                                                                    | Morocco                     |                                     |                          |

Note: *Fritillaria* species in endangered (with E as superscript) were based on the IUCN Red List of Threatened Species;

Turkey refers to the regions within its territory, including the Asian and the European regions.

## 2. Supplementary Figures

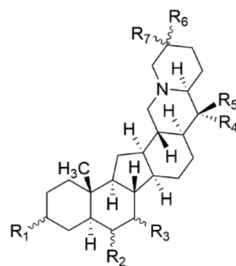

| Chemical components                 | R <sub>1</sub> | R <sub>2</sub> | R <sub>3</sub> | R <sub>4</sub> | R <sub>5</sub> | R <sub>6</sub> | R <sub>7</sub> |
|-------------------------------------|----------------|----------------|----------------|----------------|----------------|----------------|----------------|
| 3-O-acetoxyverticinone              | β-OAc          | O              |                | Me             | OH             | β-Me           |                |
| 3-O-acetylverticine                 | β-OAc          | α-OH           |                | Me             | OH             | β-Me           |                |
| dongbeinine                         | β-OH           | O              |                |                | Me             | β-Me           |                |
| ebeiedine                           | β-OH           | β-OH           |                | Me             |                | β-Me           |                |
| ebeiedinone                         | β-OH           | O              |                | Me             |                | β-Me           |                |
| ebeinine                            | β-OH           | α-H            |                | Me             | H              | β-Me           |                |
| hupeheninoside                      | α-OGlc         | α-OH           |                | Me             |                | β-Me           |                |
| isobaimonidine                      | α-OH           | α-OH           |                | Me             | OH             | β-Me           |                |
| isopeimine                          | β-OH           | β-OH           |                | Me             | OH             | β-Me           |                |
| isopeiminine                        | β-OH           | O              |                | OH             | Me             | β-Me           |                |
| peimine                             | β-OH           | α-OH           |                | Me             | OH             | β-Me           |                |
| peiminine                           | β-OH           | O              |                | Me             | OH             | β-Me           |                |
| peiminose                           | β-OGlc         | α-OH           |                | Me             | OH             | β-Me           |                |
| yibeinone E                         | β-OH           | O              |                | H <sub>2</sub> | Me             | α-Me           |                |
| zhebeinine                          | β-OH           | α-OH           |                | Me             | OH             | α-Me           |                |
| petilidine                          | β-OH           | α-OH           |                | Me             |                | α-Me           |                |
| pingpeimine A                       | β-OH           | α-OH           |                | Me             | OH             | β-Me           |                |
| pingpeimine C                       | β-OH           | O              | α-OH           | Me             | OH             | β-Me           |                |
| puqiedine                           | β-OH           | β-OH           |                | Me             | H              | α-Me           |                |
| taipainine D                        | β-OH           | α-OH           |                | Me             |                | β-Me           | α-OH           |
| verticinedinone                     | O              | O              |                | Me             | OH             | β-Me           |                |
| zhebeinone 3β-D-glucoside           | β-OGlc         | O              |                | Me             | OH             | α-Me           |                |
| zhebeirine                          | β-OH           | O              |                | Me             |                | α-Me           |                |
| eduardine                           | β-OH           | O              |                | Me             |                | β-Me           |                |
| isoforticine                        | β-OH           | α-OH           |                |                | Me             | β-Me           |                |
| puqiedinone-3-O-β-D-glucopyranoside | β-OGlc         | O              |                | Me             |                | α-Me           |                |

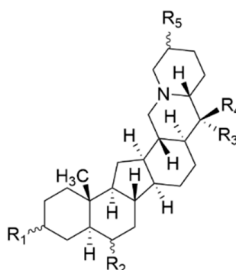

| Chemical components | R <sub>1</sub> | R <sub>2</sub> | R <sub>3</sub> | R <sub>4</sub> | R <sub>5</sub> |
|---------------------|----------------|----------------|----------------|----------------|----------------|
| wanpeinine A        | $\beta$ -OH    | $\alpha$ -OH   | Me             | OH             | $\beta$ -Me    |
| yibeinone C         | $\beta$ -OH    | O              | Me             | OH             | $\alpha$ -Me   |
| yibeinone D         | $\beta$ -OGlc  | O              | OH             | Me             | $\beta$ -Me    |
| zhebeininoside      | $\beta$ -OGlc  | $\alpha$ -OH   | Me             | OH             | $\alpha$ -Me   |
| yibeirine           | $\beta$ -OH    | $\beta$ -OH    | Me             | OH             | $\beta$ -Me    |

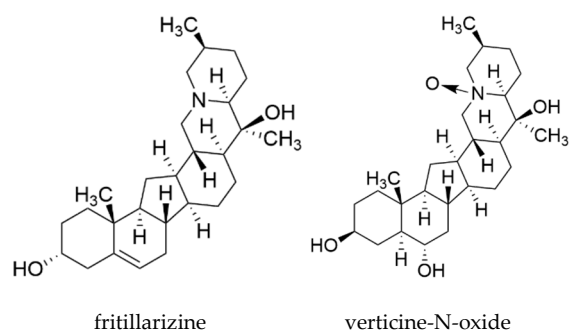

**Figure S1:** The chemical structures of 5 $\alpha$ -Cevanine isosteroidal alkaloids with *trans*-configuration.

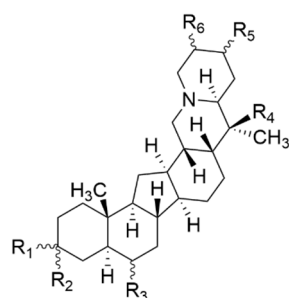

| Chemical components                           | R <sub>1</sub> | R <sub>2</sub> | R <sub>3</sub> | R <sub>4</sub> | R <sub>5</sub> | R <sub>6</sub> |
|-----------------------------------------------|----------------|----------------|----------------|----------------|----------------|----------------|
| 5α, 14α, 17β-cevanin-6-oxo-3β, 20β, 24β-triol |                | β-OH           | O              | OH             | β-OH           | β-Me           |
| delavine                                      |                | β-OH           | β-OH           |                |                | β-Me           |
| delavinone                                    |                | β-OH           | O              |                |                | β-Me           |
| frititorine A                                 |                | α-OH           | O              | OH             |                | β-Me           |
| hupehenizioside                               |                | β-OGlc         | O              |                |                | β-Me           |
| imperialine                                   |                | β-OH           | O              | OH             |                | β-Me           |
| imperialine-3β-D-glucoside                    |                | β-OGlc         | O              | OH             |                | β-Me           |
| imperialinol                                  |                | β-OH           | β-OH           | OH             |                | β-Me           |
| isodelavine                                   |                | β-OH           | α-OH           |                |                | β-Me           |
| persicanidine B                               |                | β-OH           | β-OH           |                |                | α-Me           |
| sinpeinine A                                  |                | β-OH           | O              |                |                | β-Me           |
| 3β-acetylimperialine                          | β-OAc          | α-Me           | O              | OH             |                | β-Me           |
| yibeinoside A                                 | α-H            | β-OGlc         | O              | H              |                | β-Me           |
| yubeinine                                     |                | α-OH           | O              | OH             |                | β-Me           |

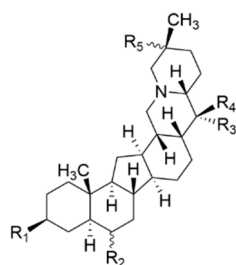

| Chemical components | R <sub>1</sub> | R <sub>2</sub> | R <sub>3</sub> | R <sub>4</sub> | R <sub>5</sub> |
|---------------------|----------------|----------------|----------------|----------------|----------------|
| taipainenine        | OH             | O              | Me             |                | α-OH           |
| tortifoline         | OH             | β-OH           |                | Me             |                |
| walujewine B        | OGlc           | β-OH           |                | Me             |                |
| walujewine C        | OH             | α-OH           |                | Me             |                |
| walujewine D        | OGlc           | α-OH           |                | Me             |                |
| walujewine E        | OGlc-Glc       | O              | Me             |                |                |
| chuanbeinone        | OH             | O              | Me             |                |                |

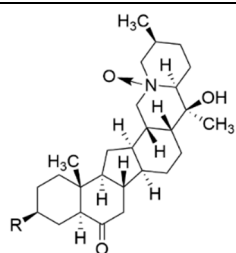

| Chemical components   | R    |
|-----------------------|------|
| frititorine B         | OGlc |
| imperialine-β-N-oxide | OH   |

Figure S2. The chemical structures of 5α-Cevanine isosteroidal alkaloids with *cis*-configuration.

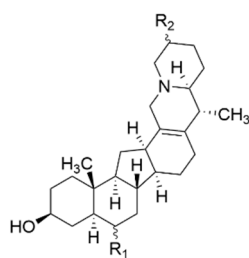

| Chemical components | R <sub>1</sub> | R <sub>2</sub> |
|---------------------|----------------|----------------|
| 27-epiebeienine     | β-OH           | β-Me           |
| ebeienine           | β-OH           | α-Me           |
| ebeinone            | O              | α-Me           |

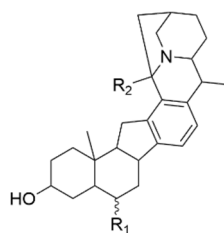

| Chemical components | R <sub>1</sub> | R <sub>2</sub> |
|---------------------|----------------|----------------|
| ussuriedine         | OH             | OH             |
| ussuriedinone       | O              | OH             |
| ussurienine         | OH             | OMe            |
| ussurienone         | O              | OMe            |

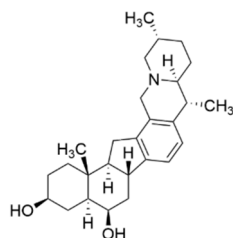

heilonine

Figure S3. The chemical structures of other 5α-Cevanine isosteroidal alkaloids.

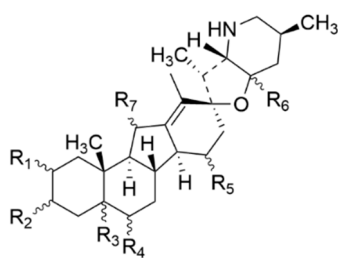

| Chemical components    | R <sub>1</sub> | R <sub>2</sub> | R <sub>3</sub> | R <sub>4</sub> | R <sub>5</sub> | R <sub>6</sub> | R <sub>7</sub> |
|------------------------|----------------|----------------|----------------|----------------|----------------|----------------|----------------|
| ebeiensine             |                | β-OH           | α-H            | O              |                | α-H            |                |
| frititorine C          |                | α-OH           | α-H            | O              |                | α-H            |                |
| kareline               | β-OH           | α-OH           | β-H            | O              | α-OH           | α-H            |                |
| kuroyurinidine         | β-OH           | α-OH           | α-H            | β-OH           |                | α-H            |                |
| peimisine              |                | β-OH           | α-H            | O              |                | α-H            |                |
| peimisine-3-O-β-D-glu- |                | β-OGlc         | α-H            | O              |                | α-H            |                |
| songbeisine            |                | β-OH           | α-H            | H <sub>2</sub> |                | α-H            | O              |
| yibeisine              |                | β-OH           | α-H            | O              |                | α-H            | β-OH           |
| 23-isokuroyurinidine   | β-OH           | α-OH           | α-H            | β-OH           |                | β-H            |                |

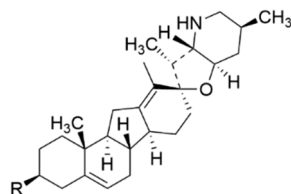

| Chemical components | R      |
|---------------------|--------|
| cycloamine          | β-OH   |
| cycloposine         | β-OGlc |

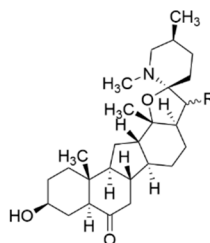

| Chemical components | R    |
|---------------------|------|
| pengbeimine B       | α-Me |
| pengbeimine D       | β-Me |

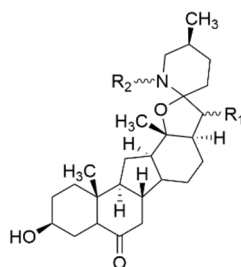

| Chemical components | R <sub>1</sub> | R <sub>2</sub> |
|---------------------|----------------|----------------|
| pengbeimine A       | β-Me           | H              |
| pengbeimine B       | α-Me           | H              |
| pengbeimine D       | α-Me           | Me             |



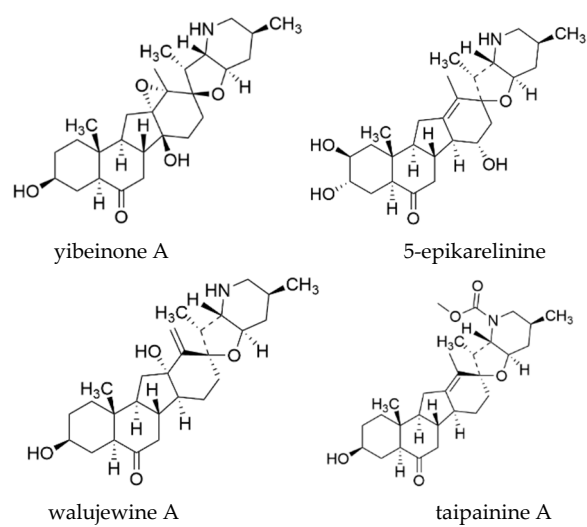

**Figure S4:** The chemical structures of Jervine isosteroidal alkaloids.

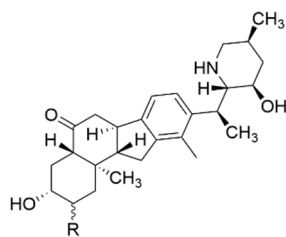

| Chemical components | R           |
|---------------------|-------------|
| pingbeimunone A     | $\beta$ -OH |
| vibeinone B         |             |

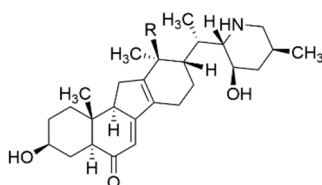

| Chemical components                                                                                                                         | R  |
|---------------------------------------------------------------------------------------------------------------------------------------------|----|
| (3 $\beta$ , 5 $\alpha$ , 13 $\alpha$ , 23 $\beta$ )-7, 8, 12, 14-tetradehydro-5, 6, 12, 13-tetrahydro-3, 23-dihydroxyveratraman-6-one      | H  |
| (3 $\beta$ , 5 $\alpha$ , 13 $\alpha$ , 23 $\beta$ )-7, 8, 12, 14-tetradehydro-5, 6, 12, 13-tetrahydro-3, 13, 23-trihydroxyveratraman-6-one | OH |

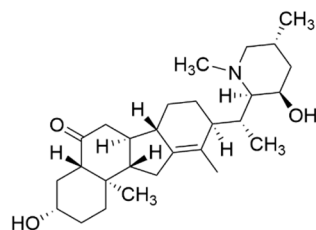

puqienine B

Figure S5. The chemical structures of Veratramine isosteroidal alkaloids.

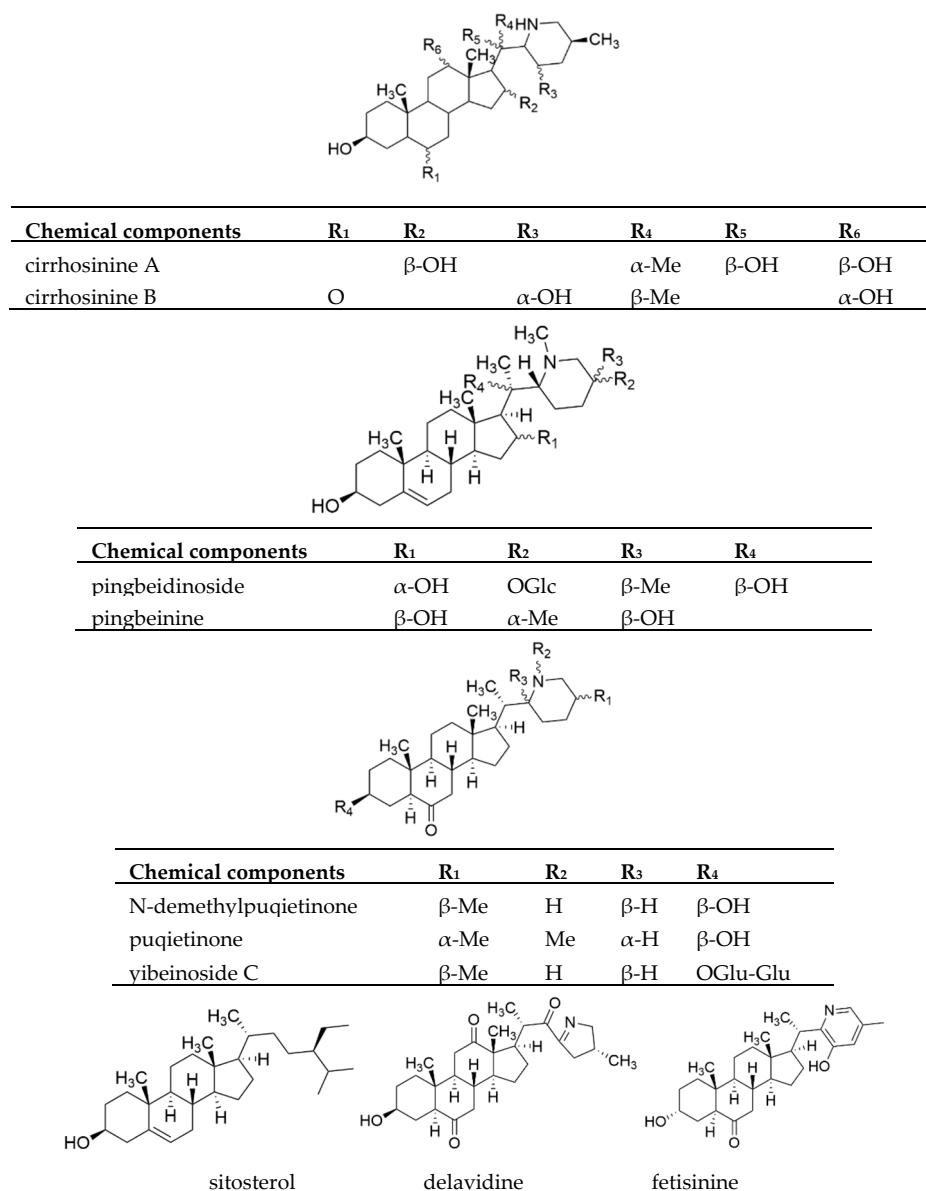

Figure S6. The chemical structures of Verazine steroidal alkaloids.

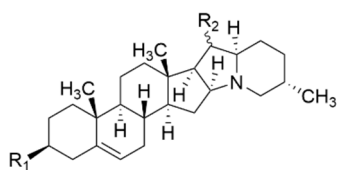

| Chemical components                                                                                                                          | R <sub>1</sub>                                       | R <sub>2</sub>  |
|----------------------------------------------------------------------------------------------------------------------------------------------|------------------------------------------------------|-----------------|
| solanidine                                                                                                                                   | OH                                                   | $\alpha$ -Me    |
| (22S,25S)-solanid-5,20 (21)-dien-3 $\beta$ -ol                                                                                               | OH                                                   | CH <sub>2</sub> |
| solanidine-3-O- $\alpha$ -L-rhamnopyranosyl-(1 $\rightarrow$ 2)-[ $\beta$ -D-glucopyranosyl-(1 $\rightarrow$ 4)]- $\beta$ -D-glucopyranoside | OGlc-(1 $\rightarrow$ 2)-Rha-(1 $\rightarrow$ 4)-Glc | $\alpha$ -Me    |

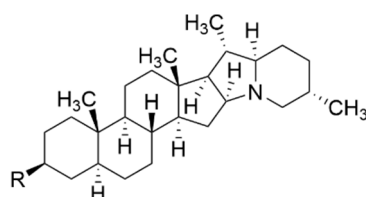

| Chemical components                                                            | R        |
|--------------------------------------------------------------------------------|----------|
| demissidine                                                                    | OH       |
| demissidine-3-O- $\beta$ -D-glucopyranosyl (1 $\rightarrow$ 4) glucopyranoside | OGlc-Glc |

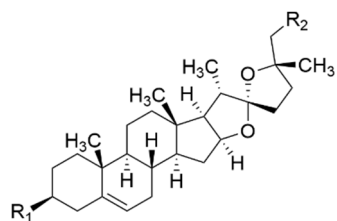

| Chemical components | R <sub>1</sub>               | R <sub>2</sub> |
|---------------------|------------------------------|----------------|
| avenacoside C       | OGlc-(1 $\rightarrow$ 2)-Rha | OGlc           |

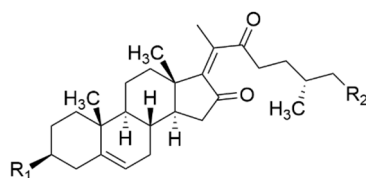

| Chemical components                                                                                                                                                       | R <sub>1</sub>               | R <sub>2</sub> |
|---------------------------------------------------------------------------------------------------------------------------------------------------------------------------|------------------------------|----------------|
| (25R)-26-[ $\beta$ -D-glucopyranosyl]oxy]-3 $\beta$ -[(O- $\alpha$ -L-rhamnopyranosyl-(1 $\rightarrow$ 2)- $\beta$ -D-glucopyranosyl]oxy]-cholesta-5,17-diene-16,22-dione | OGlc-(1 $\rightarrow$ 2)-Rha | OGlc           |

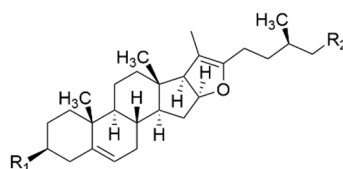

| Chemical components                                                                         | R <sub>1</sub>              | R <sub>2</sub> |
|---------------------------------------------------------------------------------------------|-----------------------------|----------------|
| 26-O- $\beta$ -D-glucopyranosyl-3,26-dihydroxy-(25R)-5 $\beta$ -furost-12-on-               | OGlc-(1 $\rightarrow$ 2)-   |                |
| 20(22)-ene-3-O- $\alpha$ -L-rhamnopyranosyl-(1 $\rightarrow$ 2)- $\beta$ -D-glucopyranoside | Rha-(1 $\rightarrow$ 4)-Glc | OGlc           |

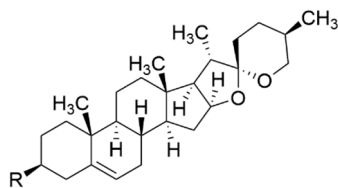

| Chemical components | R                                  |
|---------------------|------------------------------------|
| aspidistrin         | OGal-(1→4)-Glc-(1→3-)Xyl-(1→2)-Glc |

**Figure S7.** The chemical structures of solanidine steroidal alkaloids.
